# Supplementary material for: Controllable modulation of the electronic properties of graphene and silicene by interface engineering and pressure
Source: Royal Society of Chemistry journal article supplement (doi:10.1039/c3tc30567h), 2013-01-01
Supplement: c3tc30567h.pdf [file c3tc30567h.pdf]

## Supporting Information

# Controllable Modulation of Electronic Properties of Graphene and Silicene by Interface Engineering and Pressure

**Kun Chen<sup>#</sup>, Xi Wan<sup>#</sup>, and Jian-Bin Xu<sup>\*</sup>**

*Department of Electronic Engineering and Materials Science and Technology*

*Research Center, The Chinese University of Hong Kong, Shatin, N.T., Hong Kong SAR,*

*P. R. China*

---

<sup>#</sup> These authors contributed equally to this work.

<sup>\*</sup> Corresponding author e-mail: jbxu@ee.cuhk.edu.hk

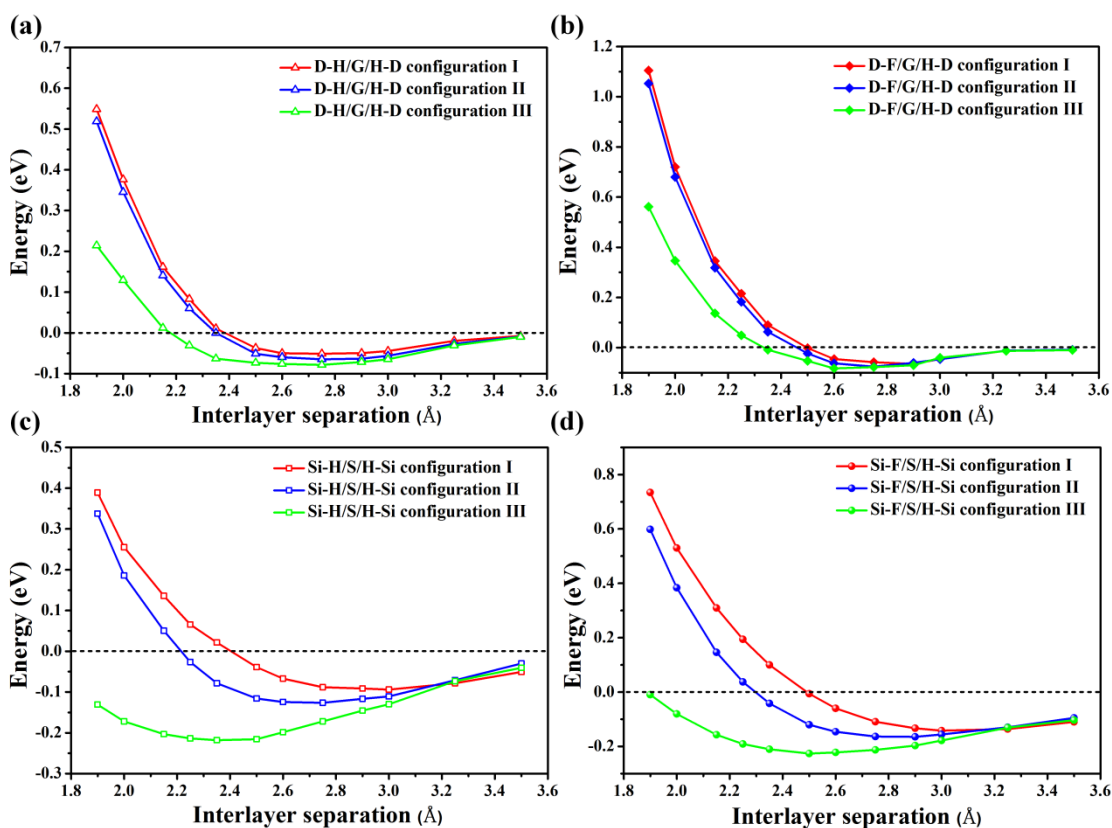

**Fig. S1** The evolution of the binding energy (BE) per unit cell of (a) D-H/G/H-D, (b) D-F/G/H-D, (c) Si-H/S/H-Si, and (d) Si-F/S/H-Si as a function of the interlayer spacing. The red color presents configuration I, the blue color presents configuration II and the green color presents configuration III. The hollow triangles present D-H/G/H-D. Rhombuses present D-F/G/H-D. Hollow squares present Si-H/S/H-Si. Spheres present Si-F/S/H-Si.

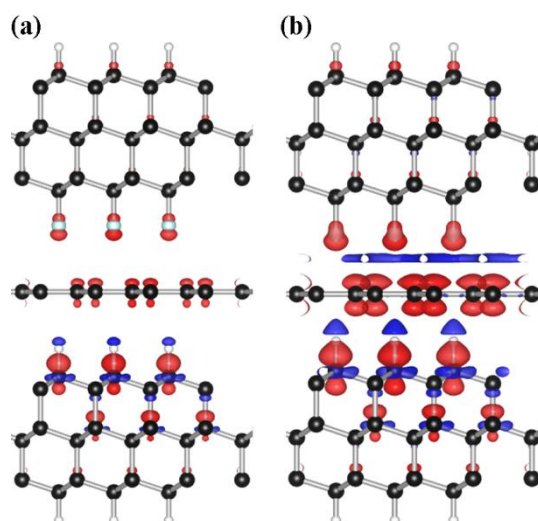

**Fig. S2** Charge density difference (CDD) in D-F/G/H-D configuration III with separations of 2.42 Å, 1.98 Å. Red and blue areas represent electron accumulation and depletion, respectively. Iso-values are 0.004 in Panel a and Panel b.

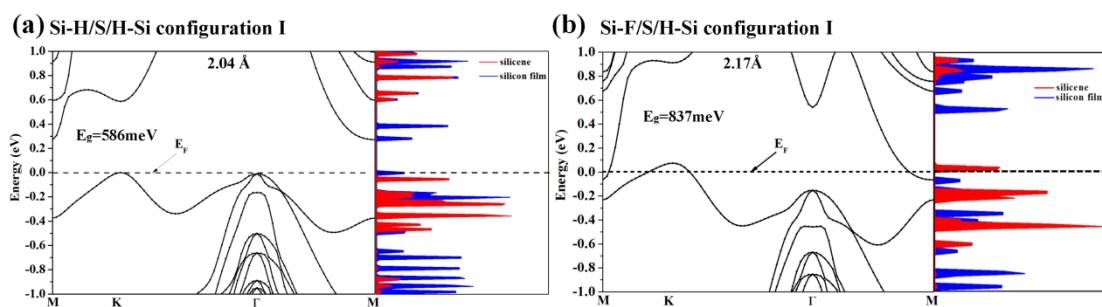

**Fig. S3** Band structure and density of states of Si-H/S/H-Si configuration I and Si-F/S/H-Si configuration I with a separation of 2.04 Å (a), and 2.17 Å (b). The red and blue areas in the density of states correspond to the states that come from silicene and silicon film, respectively.

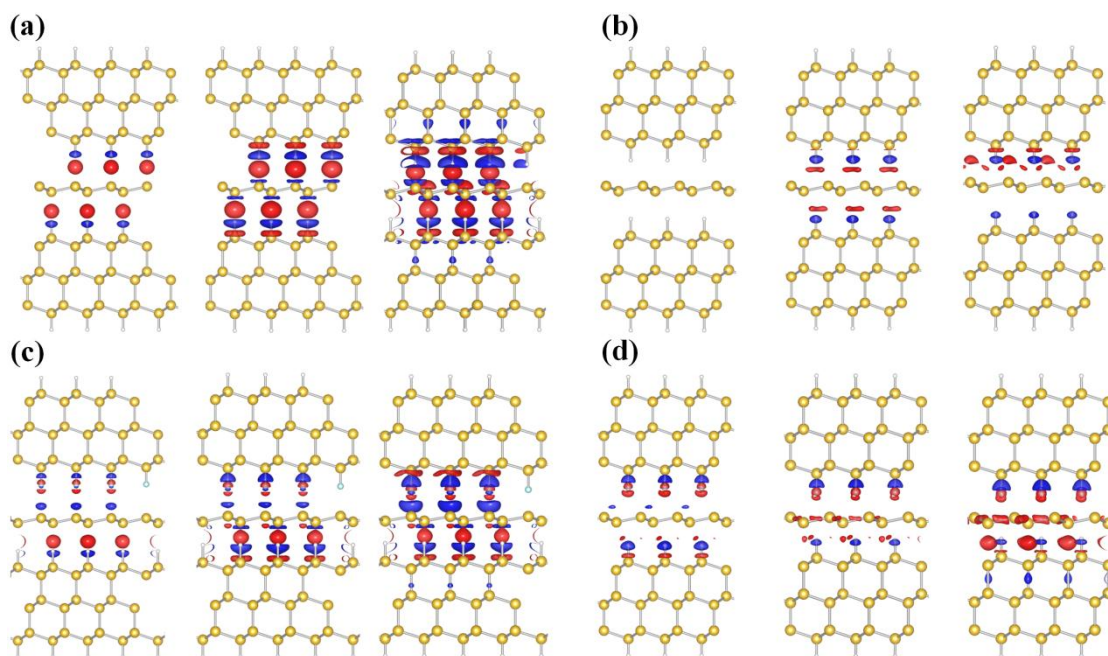

**Fig. S4** (a) Charge density difference (CDD) in Si-H/S/H-Si configuration II with separations of 2.77 Å, 2.17 Å, and 2 Å. (b) CDD in Si-H/S/H-Si configuration III with separations of 2.81 Å, 2.21 Å and 2.01 Å. (c) CDD in Si-F/S/H-Si configuration II with separations of 3.2 Å, 2.33 Å, and 2.1 Å (d) CDD in Si-F/S/H-Si configuration III with separations of 2.8 Å, 2.2 Å, 1.86 Å. Iso-values are 0.007 in Panel a, 0.005 in Panel b, 0.01 in Panel c, and 0.007 in Panel d.

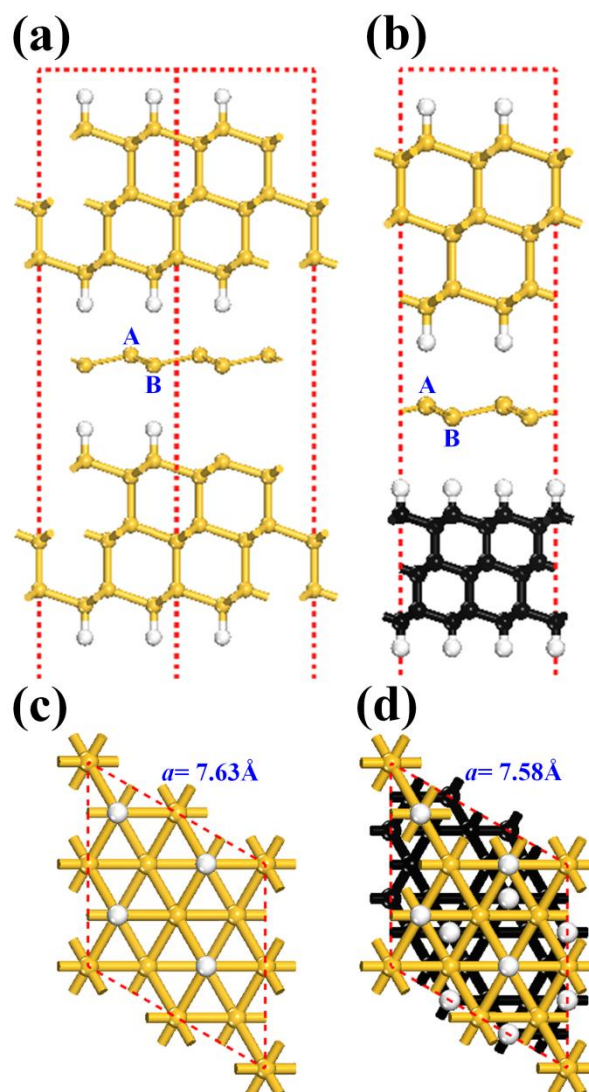

**Fig. S5** Structure diagram of 75% hydrogenated Si-H/S/H-Si configuration I and D-H/S/H-Si. Red dashed rectangles and rhombuses represent the supercells adopted in the calculations. (a) and (b) are the side views of 75% hydrogenated Si-H/S/H-Si configuration I and D-H/S/H-Si. (c) and (d) are the top views of 75% hydrogenated Si-H/S/H-Si configuration I and D-H/S/H-Si.

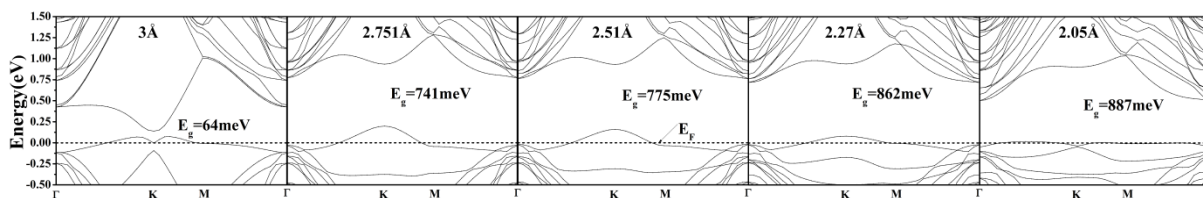

**Fig. S6** The band structures of 75% hydrogenated Si-H/S/H-Si configuration I with different interlayer spacings.

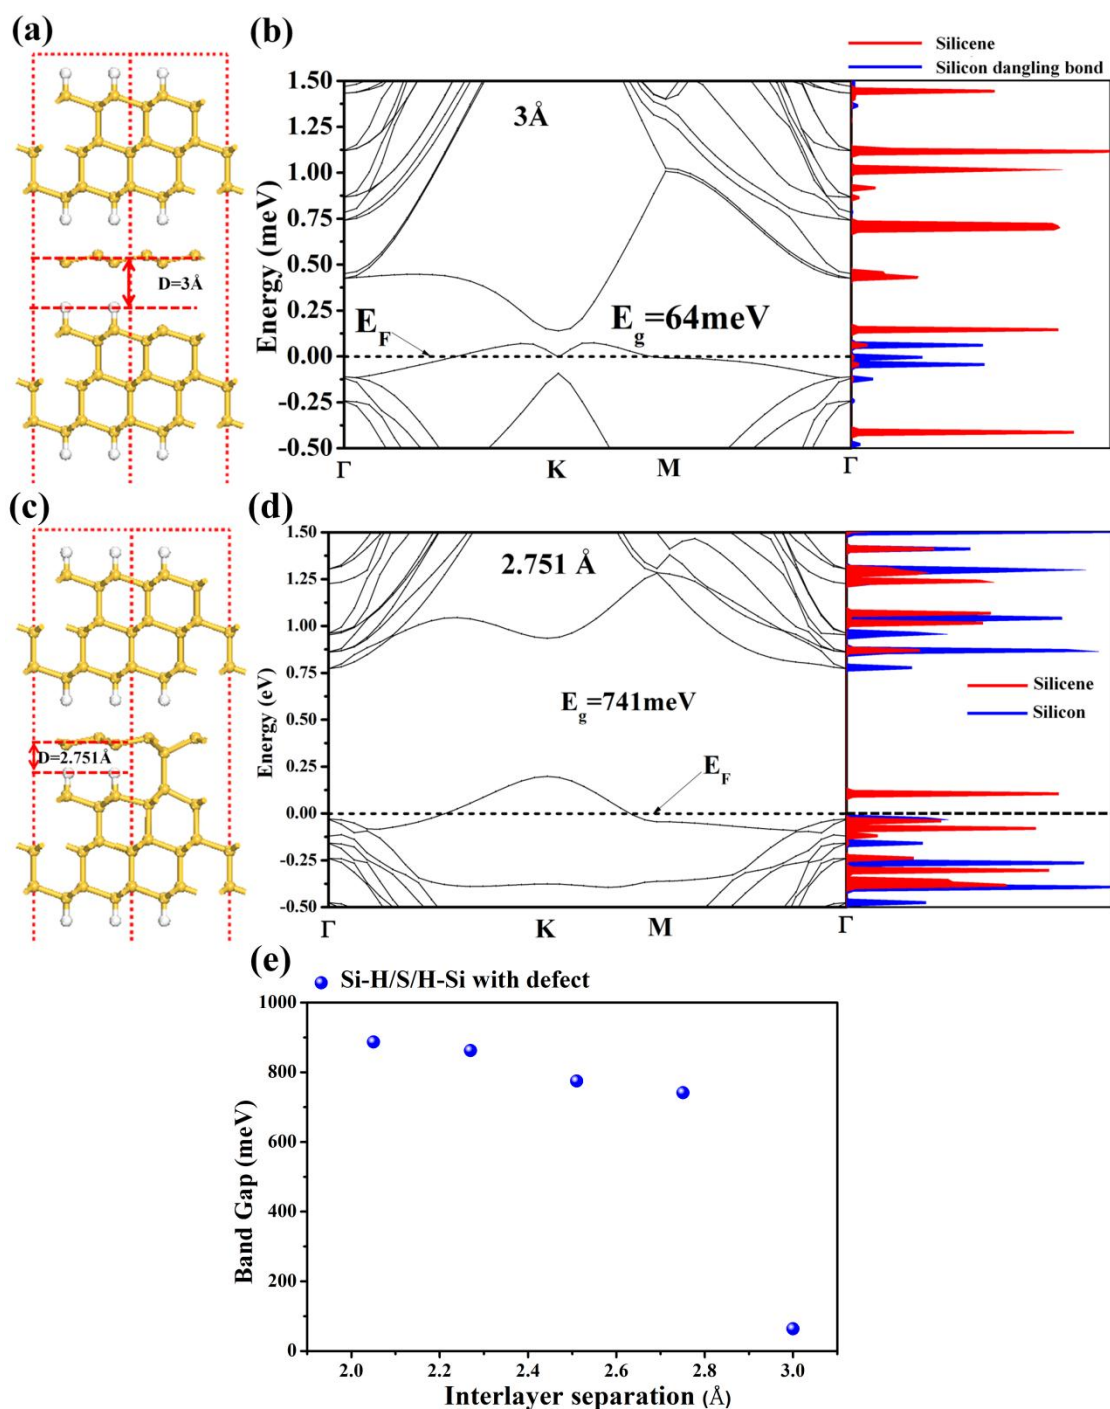

**Fig. S7** (a) The side views of 75% hydrogenated Si-H/S/H-Si configuration I with a separation of 3 Å. (b) Band structure and density of states of 75% hydrogenated Si-H/S/H-Si configuration I with a separation of 3 Å. The red and blue areas in the density of states correspond to the states that come from silicene and silicon dangling bond, respectively. (c) The side views of 75% hydrogenated Si-H/S/H-Si configuration I with a separation of 2.751 Å. (d) Band structure and density of states of 75% hydrogenated Si-H/S/H-Si configuration I with a separation of 2.751 Å. The red and blue areas in the density of states correspond to the states that come from silicene and silicon films, respectively. (e) The



variation in the energy gap of 75% hydrogenated Si-H/S/H-Si configuration I, as a function of interlayer spacing.

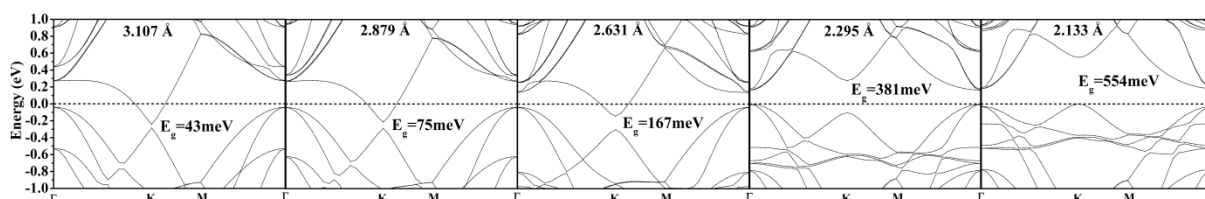

**Fig. S8** The band structures of D-H/S/H-Si with different interlayer spacings.

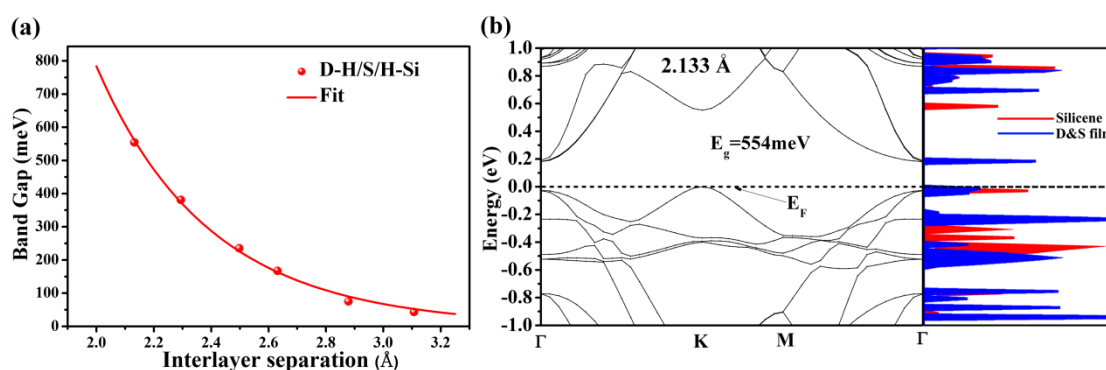

**Fig. S9** (a) The variation in the energy gap of D-H/S/H-Si, as a function of interlayer spacing. (b) Band structure and density of states of D-H/S/H-Si with a separation of 2.133 Å. The red and blue areas in the density of states correspond to the states that come from silicene and diamond & silicon films (D&S film), respectively.

**Table S1.** Summary of electronic properties of D-X/G/H-D (X = Hydrogen (H) or Fluorine (F), D=diamond layer, and G=graphene,)

| D-H/G/H-D configuration I  |                     |                     |                           |                            |                            |                          |
|----------------------------|---------------------|---------------------|---------------------------|----------------------------|----------------------------|--------------------------|
| Interlayer separation (Å)  | CBM at K point (eV) | VBM at K point (eV) | Band gap at K point (meV) | Charge of sublattice A (e) | Charge of sublattice B (e) | Effective mass ( $m_e$ ) |
| 3                          | -0.112              | -0.112              | 0                         | -0.01                      | -0.01                      | 0                        |
| 2.75                       | -0.212              | -0.212              | 0                         | -0.02                      | -0.02                      | 0                        |
| 2.52                       | -0.449              | -0.470              | 21                        | -0.03                      | -0.01                      | 0.0033                   |
| 2.3                        | -0.657              | -0.737              | 80                        | -0.03                      | -0.01                      | 0.0072                   |
| 2.1                        | -0.773              | -0.956              | 183                       | -0.04                      | -0.01                      | 0.0161                   |
| 1.92                       | -0.700              | -1.077              | 377                       | -0.05                      | -0.01                      | 0.0595                   |
| 1.83                       | -0.577              | -1.073              | 496                       | -0.06                      | -0.01                      | 0.0790                   |
| D-H/G/H-D configuration II |                     |                     |                           |                            |                            |                          |
| Interlayer                 | CBM at K            | VBM at K            | Band gap                  | Charge of                  | Charge of                  | Effective                |

| separation (Å)                     | point (eV)          | point (eV)          | at K point (meV)          | sublattice A (e)           | sublattice B (e)           | mass ( $m_e$ )           |
|------------------------------------|---------------------|---------------------|---------------------------|----------------------------|----------------------------|--------------------------|
| 3.15                               | -0.087              | -0.083              | 4                         | -0.01                      | -0.01                      | 0.00063                  |
| 2.9                                | -0.128              | -0.134              | 6                         | -0.02                      | -0.02                      | 0.00079                  |
| 2.65                               | -0.336              | -0.343              | 7                         | -0.02                      | -0.02                      | 0.00094                  |
| 2.43                               | -0.573              | -0.584              | 11                        | -0.02                      | -0.02                      | 0.0017                   |
| 2.21                               | -0.840              | -0.852              | 12                        | -0.02                      | -0.02                      | 0.0019                   |
| 2.02                               | -0.885              | -0.899              | 14                        | -0.02                      | -0.02                      | 0.0022                   |
| 1.88                               | -0.936              | 0.954               | 18                        | -0.03                      | -0.03                      | 0.0028                   |
| 1.79                               | -0.803              | -0.833              | 30                        | -0.03                      | -0.03                      | 0.0047                   |
| <b>D-F/G/H-D configuration I</b>   |                     |                     |                           |                            |                            |                          |
| Interlayer separation (Å)          | CBM at K point (eV) | VBM at K point (eV) | Band gap at K point (meV) | Charge of sublattice A (e) | Charge of sublattice B (e) | Effective mass ( $m_e$ ) |
| 2.99                               | 0                   | 0                   | 0                         | 0                          | 0                          | 0                        |
| 2.76                               | 0.004               | -0.001              | 5                         | -0.01                      | 0                          | 0.00078                  |
| 2.53                               | -0.027              | -0.050              | 23                        | -0.01                      | 0                          | 0.0036                   |
| 2.32                               | -0.018              | -0.092              | 74                        | -0.02                      | 0                          | 0.0095                   |
| 2.12                               | -0.009              | -0.200              | 191                       | -0.02                      | 0                          | 0.0258                   |
| 1.91                               | 0.126               | -0.329              | 455                       | -0.03                      | 0                          | 0.0679                   |
| <b>D-F/G/H-D configuration II</b>  |                     |                     |                           |                            |                            |                          |
| Interlayer separation (Å)          | CBM at K point (eV) | VBM at K point (eV) | Band gap at K point (meV) | Charge of sublattice A (e) | Charge of sublattice B (e) | Effective mass ( $m_e$ ) |
| 3                                  | 0                   | 0                   | 0                         | 0                          | 0                          | 0                        |
| 2.75                               | -0.012              | -0.017              | 5                         | -0.01                      | 0                          | 0.00078                  |
| 2.53                               | -0.033              | -0.040              | 7                         | -0.01                      | 0                          | 0.0011                   |
| 2.32                               | -0.038              | -0.071              | 33                        | -0.01                      | 0                          | 0.0052                   |
| 2.13                               | -0.032              | -0.112              | 70                        | -0.02                      | 0                          | 0.0077                   |
| 1.91                               | 0.042               | -0.192              | 150                       | -0.03                      | 0                          | 0.0306                   |
| <b>D-F/G/H-D configuration III</b> |                     |                     |                           |                            |                            |                          |
| Interlayer separation (Å)          | CBM at K point (eV) | VBM at K point (eV) | Band gap at K point (meV) | Charge of sublattice A (e) | Charge of sublattice B (e) | Effective mass ( $m_e$ ) |
| 3                                  | 0                   | 0                   | 0                         | 0                          | 0                          | 0                        |
| 2.75                               | -0.012              | -0.017              | 5                         | -0.01                      | 0                          | 0.00078                  |
| 2.53                               | -0.033              | -0.040              | 7                         | -0.01                      | 0                          | 0.0011                   |

|      |        |        |     |       |   |        |
|------|--------|--------|-----|-------|---|--------|
| 2.32 | -0.038 | -0.071 | 33  | -0.01 | 0 | 0.0052 |
| 2.13 | -0.032 | -0.112 | 70  | -0.02 | 0 | 0.0077 |
| 1.91 | 0.042  | -0.192 | 150 | -0.03 | 0 | 0.0306 |

**Table S2.** Summary of electronic properties of Si-X/S/H-Si (Si=silicon layer and S=silicene)

| Si-H/S/H-Si configuration I   |                     |                     |                           |                            |                            |                          |
|-------------------------------|---------------------|---------------------|---------------------------|----------------------------|----------------------------|--------------------------|
| Interlayer separation (Å)     | CBM at K point (eV) | VBM at K point (eV) | Band gap at K point (meV) | Charge of sublattice A (e) | Charge of sublattice B (e) | Effective mass ( $m_e$ ) |
| 3                             | 0.085               | -0.024              | 92                        | 0.02                       | 0                          | 0.032                    |
| 2.94                          | 0.102               | -0.008              | 110                       | 0.02                       | 0                          | 0.0333                   |
| 2.55                          | 0.228               | -0.004              | 232                       | 0.04                       | -0.01                      | 0.0893                   |
| 2.26                          | 0.316               | -0.078              | 394                       | 0.08                       | -0.04                      | 0.2294                   |
| 2.04                          | 0.588               | 0.002               | 586                       | 0.11                       | -0.07                      | 0.5780                   |
| 1.94                          | 0.588               | -0.11               | 590                       | 0.14                       | -0.09                      | 1.0724                   |
| Si-H/S/H-Si configuration II  |                     |                     |                           |                            |                            |                          |
| Interlayer separation (Å)     | CBM at K point (eV) | VBM at K point (eV) | Band gap at K point (meV) | Charge of sublattice A (e) | Charge of sublattice B (e) | Effective mass ( $m_e$ ) |
| 2.77                          | 0.005               | 0.005               | 0                         | 0.01                       | 0.01                       | 0                        |
| 2.4                           | 0.007               | 0.007               | 0                         | 0.02                       | 0.02                       | 0                        |
| 2.17                          | 0.045               | 0.001               | 44                        | 0.04                       | 0.02                       | 0.0126                   |
| 2                             | 0.047               | 0.001               | 46                        | 0.06                       | 0.03                       | 0.0142                   |
| 1.87                          | 0.144               | 0.113               | 31                        | 0.07                       | 0.05                       | 0.0099                   |
| Si-H/S/H-Si configuration III |                     |                     |                           |                            |                            |                          |
| Interlayer separation (Å)     | CBM at K point (eV) | VBM at K point (eV) | Band gap at K point (meV) | Charge of sublattice A (e) | Charge of sublattice B (e) | Effective mass ( $m_e$ ) |
| 2.81                          | 0                   | 0                   | 0                         | 0                          | 0                          | 0                        |
| 2.51                          | -0.220              | -0.220              | 0                         | -0.01                      | -0.01                      | 0                        |
| 2.21                          | -0.226              | -0.226              | 0                         | -0.01                      | -0.01                      | 0                        |
| 2.01                          | -0.287              | -0.280              | 8                         | -0.02                      | -0.01                      | 0.0025                   |
| 1.79                          | -0.252              | -0.231              | 21                        | -0.02                      | -0.01                      | 0.0065                   |
| Si-F/S/H-Si configuration I   |                     |                     |                           |                            |                            |                          |
| Interlayer separation         | CBM at K point (eV) | VBM at K point (eV) | Band gap at K point       | Charge of sublattice       | Charge of sublattice       | Effective mass ( $m_e$ ) |



| (Å)                                  |                     |                     | (meV)                     | A (e)                      | B (e)                      |                          |
|--------------------------------------|---------------------|---------------------|---------------------------|----------------------------|----------------------------|--------------------------|
| 3.17                                 | 0.375               | 0.270               | 105                       | 0.05                       | -0.02                      | 0.0281                   |
| 2.94                                 | 0.407               | 0.229               | 178                       | 0.06                       | -0.02                      | 0.0495                   |
| 2.61                                 | 0.536               | 0.147               | 389                       | 0.1                        | -0.04                      | 0.1377                   |
| 2.33                                 | 0.773               | 0.092               | 681                       | 0.17                       | -0.07                      | 0.3689                   |
| 2.17                                 | 0.911               | 0.074               | 837                       | 0.21                       | -0.10                      | 0.7554                   |
| 1.98                                 | 1.036               | 0.012               | 1024                      | 0.3                        | -0.14                      | 3.0384                   |
| <b>Si-F/S/H-Si configuration II</b>  |                     |                     |                           |                            |                            |                          |
| Interlayer separation (Å)            | CBM at K point (eV) | VBM at K point (eV) | Band gap at K point (meV) | Charge of sublattice A (e) | Charge of sublattice B (e) | Effective mass ( $m_e$ ) |
| 3.2                                  | 0.355               | 0.309               | 46                        | -0.01                      | 0.03                       | 0.0166                   |
| 2.92                                 | 0.337               | 0.315               | 21                        | 0                          | 0.04                       | 0.008                    |
| 2.5                                  | 0.309               | 0.291               | 18                        | 0.01                       | 0.05                       | 0.0059                   |
| 2.33                                 | 0.306               | 0.289               | 17                        | 0                          | 0.04                       | 0.0055                   |
| 2.18                                 | 0.304               | 0.288               | 16                        | 0.03                       | 0.08                       | 0.0049                   |
| 2.1                                  | 0.371               | 0.294               | 77                        | 0.04                       | 0.12                       | 0.0415                   |
| 1.95                                 | 0.491               | 0.139               | 352                       | 0.12                       | 0.02                       | 0.2083                   |
| <b>Si-F/S/H-Si configuration III</b> |                     |                     |                           |                            |                            |                          |
| Interlayer separation (Å)            | CBM at K point (eV) | VBM at K point (eV) | Band gap at K point (meV) | Charge of sublattice A (e) | Charge of sublattice B (e) | Effective mass ( $m_e$ ) |
| 3.05                                 | 0.345               | 0.314               | 31                        | -0.01                      | 0.03                       | 0.0096                   |
| 2.8                                  | 0.323               | 0.262               | 61                        | -0.03                      | 0.05                       | 0.0188                   |
| 2.67                                 | 0.250               | 0.191               | 59                        | -0.02                      | 0.05                       | 0.0182                   |
| 2.58                                 | 0.241               | 0.184               | 57                        | -0.02                      | 0.05                       | 0.0176                   |
| 2.2                                  | 0.244               | 0.195               | 49                        | -0.02                      | 0.07                       | 0.0151                   |
| 2.01                                 | 0.223               | 0.213               | 10                        | -0.01                      | 0.07                       | 0.0034                   |
| 1.86                                 | 0.250               | 0.194               | 56                        | -0.01                      | 0.08                       | 0.0173                   |
| 1.71                                 | 0.296               | 0.176               | 120                       | 0.04                       | 0.12                       | 0.0490                   |

**Table S3.** Summary of electronic properties of D-X/S/H-D

| D-H/S/H-D                 |                     |                     |                           |                            |                            |                          |
|---------------------------|---------------------|---------------------|---------------------------|----------------------------|----------------------------|--------------------------|
| Interlayer separation (Å) | CBM at K point (eV) | VBM at K point (eV) | Band gap at K point (meV) | Charge of sublattice A (e) | Charge of sublattice B (e) | Effective mass ( $m_e$ ) |
| 2.75                      | -0.281              | -0.281              | 0                         | -0.0175                    | -0.0175                    | 0                        |

| 2.45                      | -0.219              | -0.219              | 0                         | -0.01                      | -0.01                      | 0                        |
|---------------------------|---------------------|---------------------|---------------------------|----------------------------|----------------------------|--------------------------|
| 2.26                      | -0.145              | -0.145              | 0                         | -0.005                     | -0.005                     | 0                        |
| 2.13                      | 0                   | 0                   | 0                         | 0                          | 0                          | 0                        |
| 1.94                      | 0                   | 0                   | 0                         | 0                          | 0                          | 0                        |
| D-F/S/H-D                 |                     |                     |                           |                            |                            |                          |
| Interlayer separation (Å) | CBM at K point (eV) | VBM at K point (eV) | Band gap at K point (meV) | Charge of sublattice A (e) | Charge of sublattice B (e) | Effective mass ( $m_e$ ) |
| 3.03                      | 0.064               | 0.003               | 61                        | 0.05                       | -0.05                      | 0.0069                   |
| 2.75                      | 0.198               | 0.139               | 59                        | 0.0525                     | -0.0475                    | 0.0070                   |
| 2.57                      | 0.268               | 0.212               | 56                        | 0.065                      | -0.0325                    | 0.0078                   |
| 2.36                      | 0.285               | 0.238               | 47                        | 0.08                       | -0.015                     | 0.0097                   |
| 2.01                      | 0.274               | 0.247               | 27                        | 0.1                        | 0.08                       | 0.0140                   |

**Table S4.** Coefficient values of fitting curves for Figure 2

| $P(D) = a \exp(-bD)/D$        | $a$ (Å GPa) | $b$ (Å <sup>-1</sup> ) |
|-------------------------------|-------------|------------------------|
| D-H/G/H-D configuration I     | 14332.03    | 2.403                  |
| D-H/G/H-D configuration II    | 176217.15   | 3.503                  |
| D-F/G/H-D configuration I     | 43481.59    | 2.584                  |
| D-F/G/H-D configuration II    | 199879.95   | 3.257                  |
| D-F/G/H-D configuration III   | 36394.81    | 2.806                  |
| Si-H/S/H-Si configuration I   | 94895.18    | 3.857                  |
| Si-H/S/H-Si configuration II  | 9200.53     | 3.247                  |
| Si-H/S/H-Si configuration III | 26537.10    | 4.126                  |
| Si-F/S/H-Si configuration I   | 973.51      | 1.499                  |
| Si-F/S/H-Si configuration II  | 192100.03   | 3.749                  |
| Si-F/S/H-Si configuration III | 1783.42     | 2.192                  |
| D-H/S/H-D                     | 77784.54    | 3.009                  |
| D-F/S/H-D                     | 14231.23    | 2.139                  |

**Table S5.** Coefficient values of fitting curves for Figure 4

| Figure 4 a $E_g = \alpha e^{-\beta(D+\mu)^2}$ | $\alpha$ (Å <sup>-1</sup> meV) | $\beta$ (Å <sup>-1</sup> ) | $\mu$ (Å) |
|-----------------------------------------------|--------------------------------|----------------------------|-----------|
| D-H/G/H-D configuration I                     | 1.874                          | 0.477                      | -2.012    |
| D-H/G/H-D configuration II                    | 0.5                            | 0.137                      | 1.008     |
| D-F/G/H-D configuration I                     | 2.657                          | 0.472                      | -1.881    |

|                                                        |                                   |                                |                        |
|--------------------------------------------------------|-----------------------------------|--------------------------------|------------------------|
| D-F/G/H-D configuration II                             | 0.602                             | 0.422                          | -1.946                 |
| D-F/G/H-D configuration III                            | 51.269                            | 0.160                          | 2.768                  |
| Figure 4 c $E_g = \alpha e^{-\beta(D+\mu)^2}$          | $\alpha$ ( $\text{\AA}^{-1}$ meV) | $\beta$ ( $\text{\AA}^{-1}$ )  | $\mu$ ( $\text{\AA}$ ) |
| Si-H/S/H-Si configuration I                            | 267.776                           | 0.032                          | 9.747                  |
| Si-F/S/H-Si configuration I                            | 3.744                             | 0.088                          | -0.112                 |
| Si-F/S/H-Si configuration II                           | 509.782                           | 0.447                          | 2.594                  |
| Figure 4 d $E_g = \lambda e^{(-P/\varepsilon)} + \tau$ | $\lambda$ (meV)                   | $\varepsilon$ (GPa)            | $\tau$ (meV)           |
| Si-H/S/H-Si configuration I                            | -1501.1039                        | 19.171                         | 1429.179               |
| Si-F/S/H-Si configuration I                            | -517.592                          | 5.976                          | 597.539                |
| Figure 4 g $E_g = \lambda e^{(-D/\varepsilon)} + \tau$ | $\lambda$ (meV)                   | $\varepsilon$ ( $\text{\AA}$ ) | $\tau$ (meV)           |
| D-F/S/H-D                                              | -3302.696                         | 0.45293                        | 66.155                 |
